# Supplementary material for: Discovery of a New Microbial Origin Cold-Active Neopullulanase Capable for Effective Conversion of Pullulan to Panose
Source: MDPI journal article supplement (doi:10.3390/ijms23136928), 2022-06-22
Supplement: s1 [file s1]

## Supplementary Material

### **Discovery a new microbial origin cold-active neopullulanase capable for effective conversion pullulan to panose**

Meixing Wang<sup>1,2,†</sup>, Huizhen Hu<sup>2,3,†</sup>, Buyu Zhang<sup>2</sup>, Yang Zheng<sup>2</sup>, Pan Wu<sup>2</sup>, Zhenghui Lu<sup>2</sup> and Guimin Zhang<sup>1,\*</sup>

<sup>1</sup>College of Life Science and Technology, Beijing University of Chemical Technology, Beijing 100029, China

<sup>2</sup>State Key Laboratory of Biocatalysis and Enzyme Engineering, School of Life Sciences, Hubei University, Wuhan, Hubei 430062, China

<sup>3</sup>Yunnan Province Engineering Research Center for Functional Flower Resources and Industrialization, College of Landscape Architecture and Horticulture Sciences, Southwest Forestry University, Kunming 650224, China

\*Correspondence: zhangguimin@buct.edu.cn, zhangguimin6@hotmail.com; College of Life Science and Technology, Beijing University of Chemical Technology, Beijing 100029, China

<sup>†</sup>These authors contributed equally to this study.

**Table S1** HPLC-ELSD analysis of hydrolysis products from  $\alpha$ -cyclodextrin,  $\beta$ -cyclodextrin and  $\gamma$ -cyclodextrin by Amy117.

| Types     | Substrates             | Time (min) | Characteristic peak area | Maltose/Glucose |
|-----------|------------------------|------------|--------------------------|-----------------|
| Samples   | $\alpha$ -cyclodextrin | 12.668     | 1517.200                 | 2.584           |
|           |                        | 23.542     | 3919.800                 |                 |
|           | $\beta$ -cyclodextrin  | 12.690     | 1561.100                 | 2.680           |
|           |                        | 23.549     | 4184.400                 |                 |
|           | $\gamma$ -cyclodextrin | 12.603     | 1457.300                 | 2.954           |
|           |                        | 23.335     | 4305.500                 |                 |
|           | Glucose                | 12.641     | 1531.500                 | /               |
|           | Maltose                | 22.729     | 3867.100                 | /               |
| Standards | Maltotriose            | 37.723     | 2551.700                 | /               |

**Table S2** Information of some reported enzymes that show high sequence homology with Amy117.

| Name and GenBank number                   | Source                                        | Mol. Wt. (kDa) | Opt. Temp (°C) | Opt. pH | Reaction and products    |                            |                                                  | Reference             | Identity (compare with Amy117) |
|-------------------------------------------|-----------------------------------------------|----------------|----------------|---------|--------------------------|----------------------------|--------------------------------------------------|-----------------------|--------------------------------|
|                                           |                                               |                |                |         | Pullulan                 | Soluble starch             | Cyclodextrin                                     |                       |                                |
| MAase (ACN79585.1)                        | <i>Parageobacillus caldoxylosiyticus</i> TK4  | 70             | 50             | 7.0     | -                        | -                          | Maltose, glucose and other maltooligosaccharides | Kolcuoglu et al. 2010 | 64%                            |
| MAase (AFM43699.1)                        | <i>Geobacillus thermoleovorans</i>            | 72.5           | 80             | 5.0-9.0 | ND                       | Mainly maltose             | Mainly maltose and glucose                       | Mehta et al. 2013     | 63%                            |
| MAase BSMA (AAC46346.1)                   | <i>Geobacillus stearothermophilus</i> ET1     | 70             | 55             | 6.0     | Glucose, maltose, panose | Mainly maltose             | Mainly maltose                                   | CHA et al. 1998       | 63%                            |
| MAase ThMA (AAC15072.1); (PDB code: 1SMA) | <i>Thermus sp. strain IM6501</i>              | 68             | 60             | 6.0     | Glucose, maltose, panose | maltose and glucose        | maltose and glucose                              | Kim et al. 1999       | 62%                            |
| NPase bsNpl (AAK15003.1)                  | <i>Geobacillus stearothermophilus</i> IMA6503 | 65             | 55             | 6.0     | Glucose, maltose, panose | Mainly maltose             | Glucose, maltose                                 | Cheong et al. 2002    | 61%                            |
| CDase AfCda13 Amy98 (AAX29991.1)          | <i>Anoxybacillus flavithermus</i>             | 73             | 55-60          | 6.0     | Panose                   | Mainly Glucose and maltose | Mainly maltose and Some glucose                  | Turner et al. 2005    | 63%                            |

|                              |                      |    |       |   |        |                                  |                                  |                      |     |
|------------------------------|----------------------|----|-------|---|--------|----------------------------------|----------------------------------|----------------------|-----|
| CDase Amy132<br>(ACA48225.1) | Environmental<br>DNA | 69 | 50-65 | - | Panose | Glucose, maltose,<br>maltotriose | Glucose, maltose,<br>maltotriose | Labes et al.<br>2008 | 61% |
|------------------------------|----------------------|----|-------|---|--------|----------------------------------|----------------------------------|----------------------|-----|

**Table S3** Information of all other reported enzymes that producing panose as the only product from pullulan.

| Name and GenBank number                                | Source                                           | Mol. Wt. (kDa) | Opt. Temp (°C) | Opt. pH | Reaction and products |                               |                                 | Reference           | Identity (compare with Amy117) |
|--------------------------------------------------------|--------------------------------------------------|----------------|----------------|---------|-----------------------|-------------------------------|---------------------------------|---------------------|--------------------------------|
|                                                        |                                                  |                |                |         | Pullulan              | Starch                        | Cyclodextrin                    |                     |                                |
| CDase AfCda13 Amy98 (AAX29991.1)                       | <i>Anoxybacillus flavithermus</i>                | 73             | 55-60          | 6.0     | Panose                | Mainly Glucose and Maltose    | Mainly maltose and Some glucose | Turner et al. 2005  | 63%                            |
| CDase Amy132 (ACA48225.1)                              | Environmental DNA                                | 69             | 50-65          | -       | Panose                | Glucose, maltose, maltotriose | Glucose, maltose, maltotriose   | Labes et al. 2008   | 61%                            |
| NPase (AJT51278.1)                                     | <i>Lactobacillus mucosae</i> LM1                 | 70             | 37             | 6.0     | Panose                | -                             | -                               | Marilen et al. 2016 | 45%                            |
| $\alpha$ -amylase TVaII (BAA02473.1); (PDB code: 1JI2) | <i>Thermoactinomyces vulgaris</i> R-47           | 64             |                | 5.5-6.0 | Panose                | Maltose                       | Maltose                         | Mizuno et al. 2004  | 42%                            |
| NPase CdaA (CAB40078.1)                                | <i>Alicyclobacillus acidocaldarius</i> ATCC27009 | 66             | 55             | 5.5     | Panose                | -                             | -                               | Matzke et al. 2000  | 42%                            |
| CDase LsCda13 Amy92 (AAX29990.1)                       | <i>Laceyella sacchari</i>                        | 69             | 55             | 6.0     | Panose                | Mainly Glucose and maltose    | Mainly maltose and some glucose | Turner et al. 2005  | 41%                            |
| NPase Amy29 (ACA48224.1)                               | Environmental DNA                                | 55             | 50-65          | -       | Panose                | ND                            | ND                              | Labes et al. 2008   | 40%                            |

|                                          |                                               |    |    |     |        |                  |                  |                      |     |
|------------------------------------------|-----------------------------------------------|----|----|-----|--------|------------------|------------------|----------------------|-----|
| NPase<br>(AAD05199.1)                    | <i>Paenibacillus<br/>polymyxa</i> CECT<br>155 | 58 | 50 | 6.0 | Panose | -                | -                | Yebra et<br>al. 1999 | 26% |
| $\alpha$ -amylase Rbamy5<br>(SPE91476.1) | <i>Ruminococcus<br/>bromii</i> ATCC<br>27255  | 60 | 45 | 6.0 | Panose | Glucose, maltose | Glucose, maltose | Jung et al.<br>2019  | 21% |
| MAase CoMA<br>(AVC05420.1)               | <i>Corallococcus</i><br>sp. EGB               | 60 | 50 | 7.0 | Panose | Maltose          | Maltose          | Zhou et al.<br>2018  | 18% |

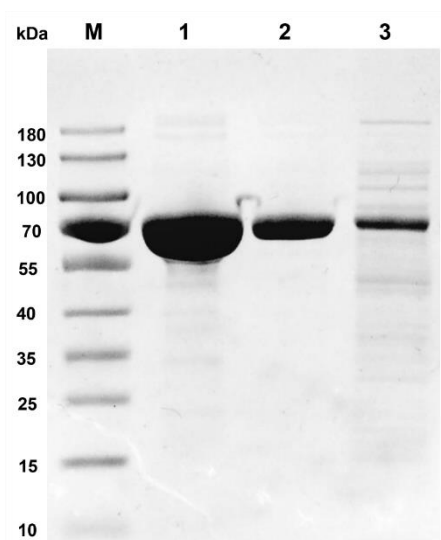

**Figure S1.** SDS-PAGE analysis of the recombinant Amy117 at each purification step. Samples were resolved on 12% polyacrylamide gel and then stained with Coomassie Blue R-250. Lane 1, purification Amy117 after desalting; lane 2, purified Amy117 after Ni-affinity column chromatography; lane 3, cellular proteins from the crude extract and Lane M, protein molecular weight markers.

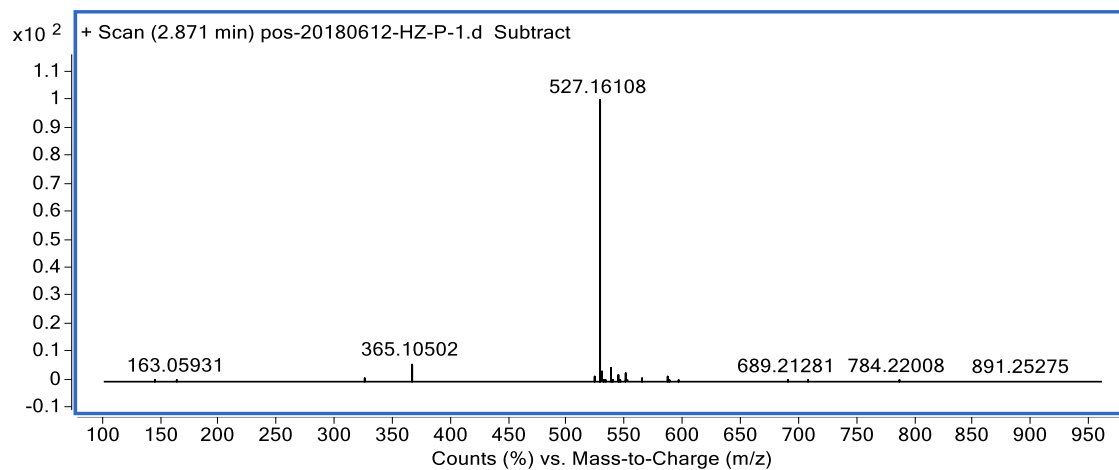

**Figure S2.** LC-MS on the hydrolytic product from pullulan of Amy117.



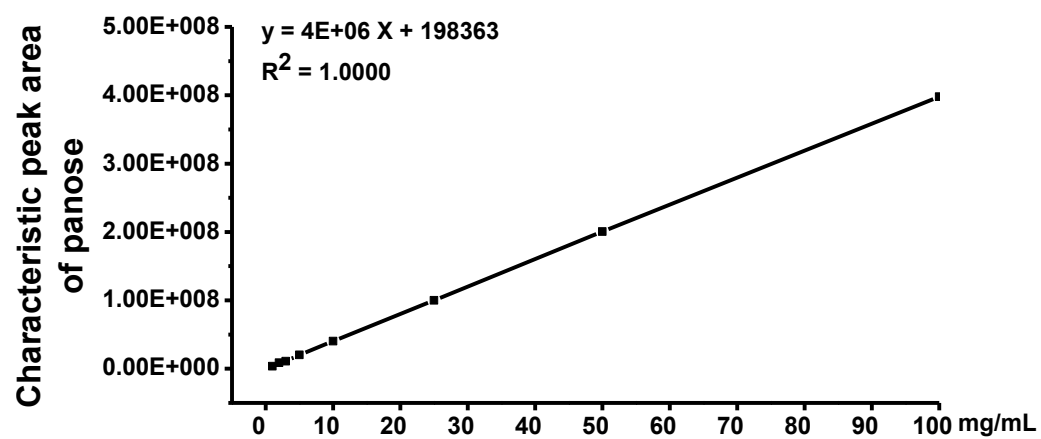

**Figure S3.** The standard curve of the concentration of panose (the abscissa values) vs the characteristic peak areas (ordinate values).

1 10 20 30 40 50 60 70 80  
Amy117 .QKEAIYHRPKNEFAYAYN.ERDLHRLKTKKDDVEEVELLYGDPYEWDEKGTG...WMFQTEKMMKTGSDDLFDYWFKEVSPFFRRRYG  
AA229991.1 MLKEAVYHRPTDQFAYAYD.DKTLHRLKTKKSDVHAVSLLLHGDPPYCWEDRQ...WQFTKTEMTKSGSDALFDYWWVAISPPYRRRLYG  
ACA48225.1 MLKEAIYHRPKDGYAYASTMERTLHRLKTKKDDVAVFLLFGDPYVWEDGA...WQFDKPKMQKNGCDALFDYWFIAVQPPYRRRLYG  
AJT51278.1 MNLAGIYHRPESEMAYLYT.KDVMHRLKTAQDDITQVLLHGDPPYSLHSDPDLKFKYKHFTPMKKIHSDGVDYDQAAITTEPKRRRLAYG  
BAA02473.1 MLLEAIFHEAKGSYATPIS.ETQURVRLRAKKGDDVRCRVLVADRYASPEEE...LAHALAGAKGSDERFDYFEALIECSKTRRYKYV  
CAB40078.1 .MELVQWHRWADADYLDLSTMVLVLRVARCTPAQRVRVHGDRYEDFQNG...SSEARYSGSDGTFDWFTRVAPTRRLKYA  
AA229990.1 MLLEAIFHEATRVFYACPEN.LHSLRVLRAKKGGEIARCLVLHADRYELLDSC...FOQTEENWASDQRFDYFEALIECTARRQYV  
ACA48224.1 .....  
AAD05199.1 .....MLT  
SPE91476.1 .....MKKILSILLAGAMLAGCV  
AVC05420.1 .....MRPLRGLSLCS  
90 100 110 120 130 140 150 160  
Amy117 FRIRSKNE.CLIYTERGYFENSP...ADAGFYFCFFFLNREVDVFAPFEVVRDITVWQIFFERRFANGD...KSLNPDGLPFG.SISF  
AA229991.1 FELVSGNE.RCVYTEKGFHEAPI...DDTAYYFCFFFLNRRIDVFHAPFTWVKDITVWQIFFERRFANGD...PSLNPGLTIPWG.SADP  
ACA48225.1 FELHDEEN.VLIYTEKGFYEKAPT...DDTAYYFCFFFLNRRIDVFDAFSTWVKDITVWQIFFERRFANGD...PKLNPPHILPFG.SVDF  
AJT51278.1 FELTDQKGGQLIYADKCFIQPTDQKLLDDANTYFRMPYQDDIDAFHAPKWEKTVWQIFFERRFANGD...STNDPTGKPKPDQPTH  
BAA02473.1 FLITGPGGGAAYVFGGTGFSAERSK...AGVFQYAYIHRSSEVFTTPEWAKEAVIYQIFFERRFANGD...PSNDPFGTEQAKDAP  
CAB40078.1 FELVLSSTGRAVYLGEGGLADTLDA...VQFPQYPIHPSRLVAVPDWVGHAAYVQIFFERRFANGD...QQLVRP.TDPWD...ARF  
AA229990.1 FLILEGKKGERVYFGESGVSKERNR...AGVFQYAYIHRSSEVFTTPEWAKDADVYQIFFERRFANGD...KENDPRTDESKDAP  
ACA48224.1 .....MTDPDWKDAVYQIFFERRFANGD...QQLVRP.TDPWD...ARF  
AAD05199.1 MFSSAMAEQDMNGHKFPNSAG...SGVFYELIYINSYDSN...KENDPRTDESKDAP  
SPE91476.1 LFCSSSSSSSSSSSSSNTAKVADP...IEGVKATASDKYRNVEIFVRSFCDSEN...KENDPRTDESKDAP  
AVC05420.1 AALLSACAGSSSPAPFAPSAGNI...TLAPAGADWYRGAVYELVRSFQDSN...KENDPRTDESKDAP  
170 180 190 200 210 220 230 240  
Amy117 TPTNFFGCDLGVENHLDYLS...QLGISGIYLBIFKAHSHHYDTIDYMEIDPQETKNTFKHFVKACARGIRVMIDAVENH  
AA229991.1 TPTSFYGGDFAGIMERLDYLV...QLGNGIYLFIFKASSNHYDTIDYFEIDPQEGDKPTFKRLVVERCHQIRVIMIDAVENH  
ACA48225.1 TTTSFFGGDFECIMKRLDYLV...QLGNGIYLFIFKAPSNHYDTIDYFEIDPQEGDKPTFKRLVVERCHQIRVIMIDAVENH  
AJT51278.1 GRDSFYGGDFECIMKRLDYLV...QLGNGIYLFIFKAPSNHYDTIDYFEIDPQEGDKPTFKRLVVERCHQIRVIMIDAVENH  
BAA02473.1 GRDSFYGGDFECIMKRLDYLV...QLGNGIYLFIFKAPSNHYDTIDYFEIDPQEGDKPTFKRLVVERCHQIRVIMIDAVENH  
CAB40078.1 GRDSFYGGDFECIMKRLDYLV...QLGNGIYLFIFKAPSNHYDTIDYFEIDPQEGDKPTFKRLVVERCHQIRVIMIDAVENH  
AA229990.1 GRDSFYGGDFECIMKRLDYLV...QLGNGIYLFIFKAPSNHYDTIDYFEIDPQEGDKPTFKRLVVERCHQIRVIMIDAVENH  
ACA48224.1 TLRGFKCGLNIGWIEALDYLO...QLGNGIYLFIFKAPSNHYDTIDYFEIDPQEGDKPTFKRLVVERCHQIRVIMIDAVENH  
AAD05199.1 ...GDGEGCDLKGCTHLDYLDNDGNFNSGKQLVSGGLWMLPELNSPSHYHYVDTDYQVDPQVGNLNDFTLTKEARKGVYVILDLVNH  
SPE91476.1 ...GDKETGLDGLGHSISLDYLDNDGNFNSGKQLVSDALWMLPELNSPSHYHYVDTDYQVDPQVGNLNDFTLTKEARKGVYVILDLVNH  
AVC05420.1 ...GDGEGCDLKGCTHLDYLDNDGNFNSGKQLVSDALWMLPELNSPSHYHYVDTDYQVDPQVGNLNDFTLTKEARKGVYVILDLVNH  
250 260 270 280 290 300 310 320  
Amy117 SGYYFFAFDDVILKNGKDNYREWFTHIEFFITIEEA...DGDVRFNYDAFAF.VTIPMLNTEHPEVKEIYLNVAAYTWIRFEDID  
AA229991.1 SGYYFFAFDDVILKNGKDNYREWFTHIEFFITIEEA...DGDVRFNYDAFAF.VTIPMLNTEHPEVKEIYLNVAAYTWIRFEDID  
ACA48225.1 SGYYFFAFDDVILKNGKDNYREWFTHIEFFITIEEA...DGDVRFNYDAFAF.VTIPMLNTEHPEVKEIYLNVAAYTWIRFEDID  
AJT51278.1 IGDQSPMMDVILKYGGSRYADWFHYNQFPATYIPTANF...EFAKDATYDTFDY.TPHMPLNTEHPEVKEIYLNVAAYTWIRFEDID  
BAA02473.1 AGDQFAPFDDVILKNGKDNYREWFTHIEFFITIEEA...DGDVRFNYDAFAF.VTIPMLNTEHPEVKEIYLNVAAYTWIRFEDID  
CAB40078.1 SGQDFAFDDVILKNGKDNYREWFTHIEFFITIEEA...DGDVRFNYDAFAF.VTIPMLNTEHPEVKEIYLNVAAYTWIRFEDID  
AA229990.1 SGQDFAFDDVILKNGKDNYREWFTHIEFFITIEEA...DGDVRFNYDAFAF.VTIPMLNTEHPEVKEIYLNVAAYTWIRFEDID  
ACA48224.1 CGRAHFAFHVMENEAASPYRDWFHIEYKPLAAY...TKHPNYAAMWN.NPXLKFNITSPECRAVILFRVAEYWL.BMGID  
AAD05199.1 SSSEHFWKEASAN.PQSKYHDYVWADENTNLDEKSGWGQVWHKNPNGEYGYGTFWSGMDLNFDPNPKVRKEMIRVAGYWL.QQAGD  
SPE91476.1 ASSKNLPLFAKVEEADNKLGDNAEYFIEHKAASYFDSN...TQTISLNGYACEANFSGEMPEWNLNKKRTEFTKIAFWL.DRGVD  
AVC05420.1 TSEHFWKEASAN.PQSKYHDYVWADENTNLDEKSGWGQVWHKNPNGEYGYGTFWSGMDLNFDPNPKVRKEMIRVAGYWL.QQAGD  
330 340 350 360 370 380 390  
Amy117 GWRMDVANEIDH...SFWRFRKVVVRDIPDVYILGEIWHDSMPWTL...GDQFDVAMNYPVTNATIDFAGK  
AA229991.1 GWRMDVANEVDH...SFWRFRQAVKAVKQDVYILGEIWHDSMPWTL...GDQFDVAMNYPVTNATIDFAGK  
ACA48225.1 GWRMDVANEVDH...SFWRFRQAVKAVKQDVYILGEIWHDSMPWTL...GDQFDVAMNYPVTNATIDFAGK  
AJT51278.1 GWRMDVANEVDH...SFWRFRQAVKAVKQDVYILGEIWHDSMPWTL...GDQFDVAMNYPVTNATIDFAGK  
BAA02473.1 GWRMDVANEVDH...SFWRFRRLVKSINPDALIVGEIWHDSMPWTL...GDQFDVAMNYPVTNATIDFAGK  
CAB40078.1 GWRMDVANEVDH...SFWRFRRLVKSINPDALIVGEIWHDSMPWTL...GDQFDVAMNYPVTNATIDFAGK  
AA229990.1 GWRMDVANEVDH...SFWRFRRLVKSINPDALIVGEIWHDSMPWTL...GDQFDVAMNYPVTNATIDFAGK  
ACA48224.1 GWRMDVANEVDH...SFWRFRRLVKSINPDALIVGEIWHDSMPWTL...GDQFDVAMNYPVTNATIDFAGK  
AAD05199.1 GWRMDVANEVDH...SFWRFRRLVKSINPDALIVGEIWHDSMPWTL...GDQFDVAMNYPVTNATIDFAGK  
SPE91476.1 GWRMDVANEVDH...SFWRFRRLVKSINPDALIVGEIWHDSMPWTL...GDQFDVAMNYPVTNATIDFAGK  
AVC05420.1 GWRMDVANEVDH...SFWRFRRLVKSINPDALIVGEIWHDSMPWTL...GDQFDVAMNYPVTNATIDFAGK  
400 410 420 430 440 450 460  
Amy117 HSIN...SKAFIEQFTKLHMYPRSVQEVAFNLLGSHDTPRLTLTSCAND.EDLVKLQQLLQFSLPGLTFCYGGDEH  
AA229991.1 HSIN...SKAFIEQFTKLHMYPRSVQEVAFNLLGSHDTPRLTLTSCAND.EDLVKLQQLLQFSLPGLTFCYGGDEH  
ACA48225.1 HSIN...SKAFIEQFTKLHMYPRSVQEVAFNLLGSHDTPRLTLTSCAND.EDLVKLQQLLQFSLPGLTFCYGGDEH  
AJT51278.1 HSIN...SKAFIEQFTKLHMYPRSVQEVAFNLLGSHDTPRLTLTSCAND.EDLVKLQQLLQFSLPGLTFCYGGDEH  
BAA02473.1 HSIN...SKAFIEQFTKLHMYPRSVQEVAFNLLGSHDTPRLTLTSCAND.EDLVKLQQLLQFSLPGLTFCYGGDEH  
CAB40078.1 HSIN...SKAFIEQFTKLHMYPRSVQEVAFNLLGSHDTPRLTLTSCAND.EDLVKLQQLLQFSLPGLTFCYGGDEH  
AA229990.1 HSIN...SKAFIEQFTKLHMYPRSVQEVAFNLLGSHDTPRLTLTSCAND.EDLVKLQQLLQFSLPGLTFCYGGDEH  
ACA48224.1 HSIN...SKAFIEQFTKLHMYPRSVQEVAFNLLGSHDTPRLTLTSCAND.EDLVKLQQLLQFSLPGLTFCYGGDEH  
AAD05199.1 HSIN...SKAFIEQFTKLHMYPRSVQEVAFNLLGSHDTPRLTLTSCAND.EDLVKLQQLLQFSLPGLTFCYGGDEH  
SPE91476.1 HSIN...SKAFIEQFTKLHMYPRSVQEVAFNLLGSHDTPRLTLTSCAND.EDLVKLQQLLQFSLPGLTFCYGGDEH  
AVC05420.1 HSIN...SKAFIEQFTKLHMYPRSVQEVAFNLLGSHDTPRLTLTSCAND.EDLVKLQQLLQFSLPGLTFCYGGDEH  
470 480 490 500 510 520  
Amy117 MTNGAD...GCGECMVWDEEK...QNGQPFKYVQQLIQRTQSEAFGRDGLTFVPTNLASPLL  
AA229991.1 MTNGAD...GCGECMVWDEEK...QNGQPFKYVQQLIQRTQSEAFGRDGLTFVPTNLASPLL  
ACA48225.1 MTNGAD...GCGECMVWDEEK...QNGQPFKYVQQLIQRTQSEAFGRDGLTFVPTNLASPLL  
AJT51278.1 MTNGAD...GCGECMVWDEEK...QNGQPFKYVQQLIQRTQSEAFGRDGLTFVPTNLASPLL  
BAA02473.1 MTNGAD...GCGECMVWDEEK...QNGQPFKYVQQLIQRTQSEAFGRDGLTFVPTNLASPLL  
CAB40078.1 MTNGAD...GCGECMVWDEEK...QNGQPFKYVQQLIQRTQSEAFGRDGLTFVPTNLASPLL  
AA229990.1 MTNGAD...GCGECMVWDEEK...QNGQPFKYVQQLIQRTQSEAFGRDGLTFVPTNLASPLL  
ACA48224.1 MTNGAD...GCGECMVWDEEK...QNGQPFKYVQQLIQRTQSEAFGRDGLTFVPTNLASPLL  
AAD05199.1 MTNGAD...GCGECMVWDEEK...QNGQPFKYVQQLIQRTQSEAFGRDGLTFVPTNLASPLL  
SPE91476.1 MTNGAD...GCGECMVWDEEK...QNGQPFKYVQQLIQRTQSEAFGRDGLTFVPTNLASPLL  
AVC05420.1 MTNGAD...GCGECMVWDEEK...QNGQPFKYVQQLIQRTQSEAFGRDGLTFVPTNLASPLL  
530 540 550 560 570 580  
Amy117 YIVRTKNEQLVFINAERESHEFFIDDEFI...NLPTKELFSEQVMEP...SAKI.RIGPKQAIVLKKL...  
AA229991.1 YIVRTKNEQLVFINAERESHEFFIDDEFI...NLPTKELFSEQVMEP...SAKI.RIGPKQAIVLKKL...  
ACA48225.1 YIVRTKNEQLVFINAERESHEFFIDDEFI...NLPTKELFSEQVMEP...SAKI.RIGPKQAIVLKKL...  
AJT51278.1 YIVRTKNEQLVFINAERESHEFFIDDEFI...NLPTKELFSEQVMEP...SAKI.RIGPKQAIVLKKL...  
BAA02473.1 YIVRTKNEQLVFINAERESHEFFIDDEFI...NLPTKELFSEQVMEP...SAKI.RIGPKQAIVLKKL...  
CAB40078.1 YIVRTKNEQLVFINAERESHEFFIDDEFI...NLPTKELFSEQVMEP...SAKI.RIGPKQAIVLKKL...  
AA229990.1 YIVRTKNEQLVFINAERESHEFFIDDEFI...NLPTKELFSEQVMEP...SAKI.RIGPKQAIVLKKL...  
ACA48224.1 YIVRTKNEQLVFINAERESHEFFIDDEFI...NLPTKELFSEQVMEP...SAKI.RIGPKQAIVLKKL...  
AAD05199.1 YIVRTKNEQLVFINAERESHEFFIDDEFI...NLPTKELFSEQVMEP...SAKI.RIGPKQAIVLKKL...  
SPE91476.1 YIVRTKNEQLVFINAERESHEFFIDDEFI...NLPTKELFSEQVMEP...SAKI.RIGPKQAIVLKKL...  
AVC05420.1 YIVRTKNEQLVFINAERESHEFFIDDEFI...NLPTKELFSEQVMEP...SAKI.RIGPKQAIVLKKL...

**Figure S4.** Sequence alignment of Amy17 from *Bacillus pseudofirmus* 703 with other neopullulanases that producing panose as the only product from pullulan. Numbers on the left are the positions of the first amino acids in each line. The listed sequences include the NPase Amy98 from *A. flavithermus* (AAX29991.1, 63%), MAase from a *Thermus* strain (ThMA), NPase Amy132 from environmental DNA (ACA48225.1, 61%), NPase from *Lactobacillus mucosae* LM1 (AJT51278.1, 45%),  $\alpha$ -amylase TVaII from *Thermoactinomyces vulgaris* R-47 (PDB: 1WZM\_A, 42%), NPase CdaA from *Alicyclobacillus acidocaldarius* ATCC27009 (CAB40078.1, 42%), CDase LsCda13 Amy92 from *Laceyella sacchari* (AAX29990.1, 41%), NPase Amy29 from environmental DNA (ACA48224.1, 40%), NPase from *Paenibacillus polymyxa* CECT 155 (AAD05199.1, 26%),  $\alpha$ -amylase Rbamy5 from *Ruminococcus bromii* ATCC 27255 (SPE91476.1, 21%), MAase CoMA from *Corallococcus* sp. EGB (AVC05420.1, 18%). The catalytic triads (DED) are marked with the diamonds.

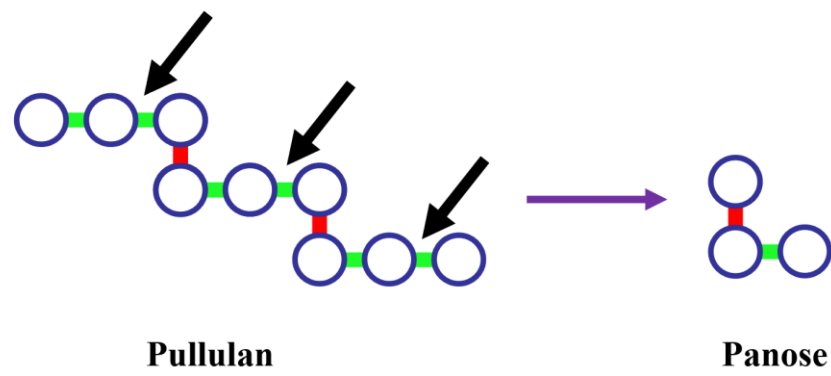

**Figure S5.** The reaction from pullulan to panose. Amy117 cleave  $\alpha$ -1, 4-linkages of pullulan to produce panose. Green bond is the  $\alpha$ -1, 4 glycosidic bond, red bond is the  $\alpha$ -1, 6 glycosidic bond.
